# Supplementary material for: Renal scattered tubular-like cells confer protective effects in the stenotic murine kidney mediated by release of extracellular vesicles
Source: PubMed Central journal article supplement (PMC5775303; doi:10.1038/s41598-018-19750-y), 2018-01-19

# **Renal scattered tubular-like cells confer protective effects in the stenotic murine kidney mediated by release of extracellular vesicles**

Xiangyu Zou<sup>1,2</sup> MD, PhD, Soon Hyo Kwon<sup>1,3</sup> MD, Kai Jiang<sup>1</sup> PhD, Christopher M. Ferguson<sup>1</sup> M Sci, Amrutesh S. Puranik<sup>1</sup> PhD, Xiangyang Zhu<sup>1</sup> MD, PhD, Lilach O. Lerman<sup>1</sup> MD, PhD

<sup>1</sup>Division of Nephrology and Hypertension, Mayo Clinic, Rochester, MN, USA

<sup>2</sup>Department of Urology, Xinhua Hospital, Shanghai Jiao Tong University School of Medicine, Shanghai, China

<sup>3</sup>Division of Nephrology, Soonchunhyang University Seoul Hospital, Korean

Original blots for Figure 5

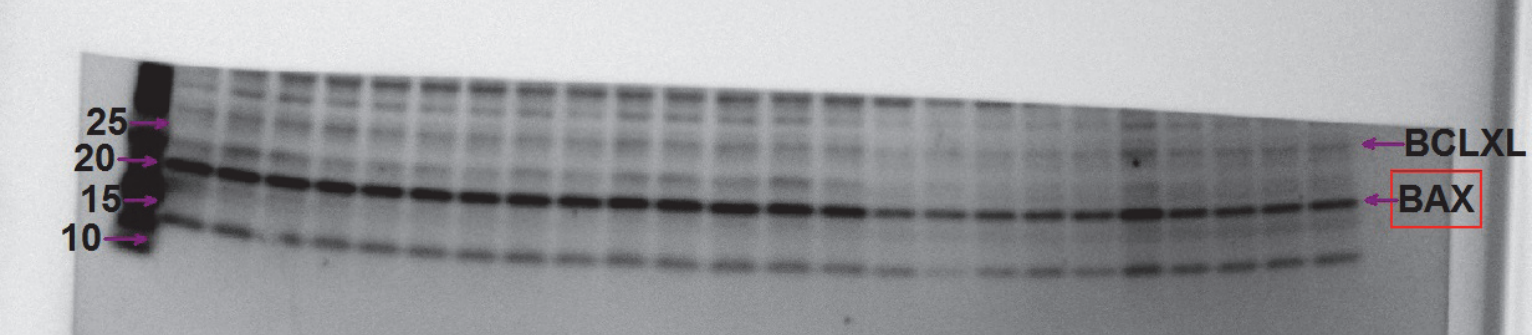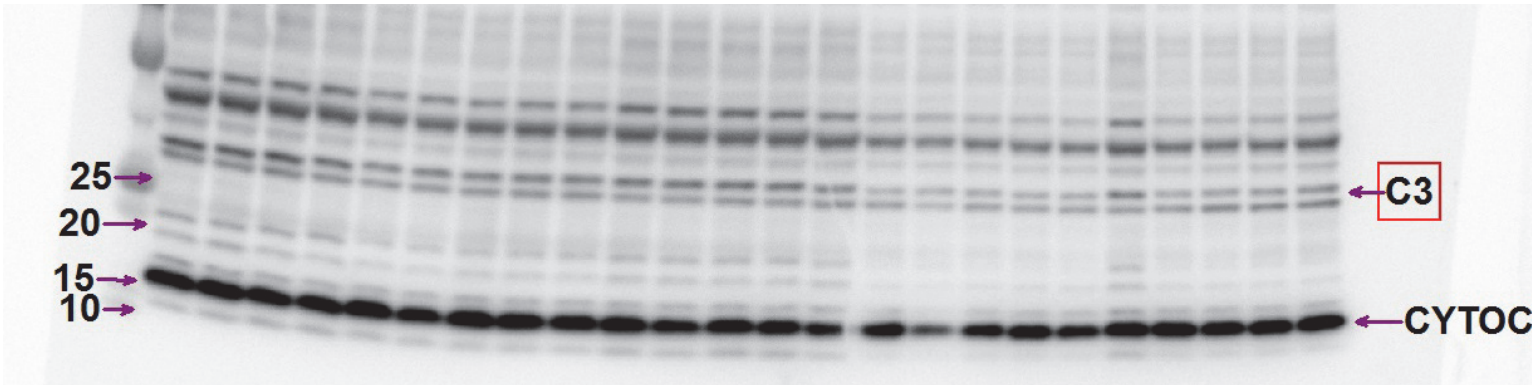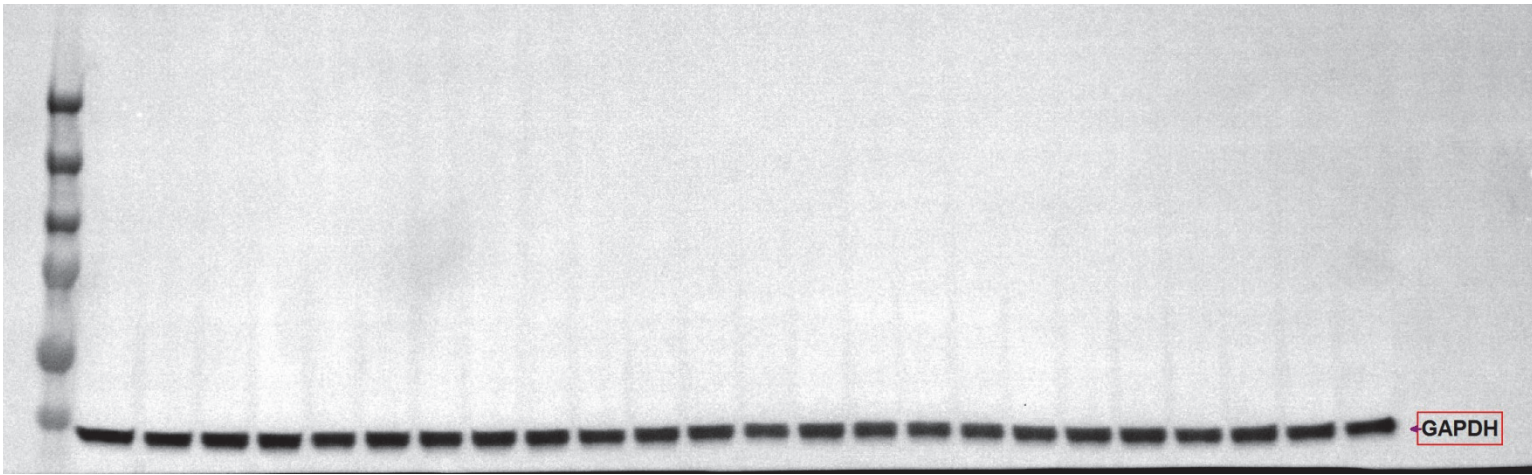

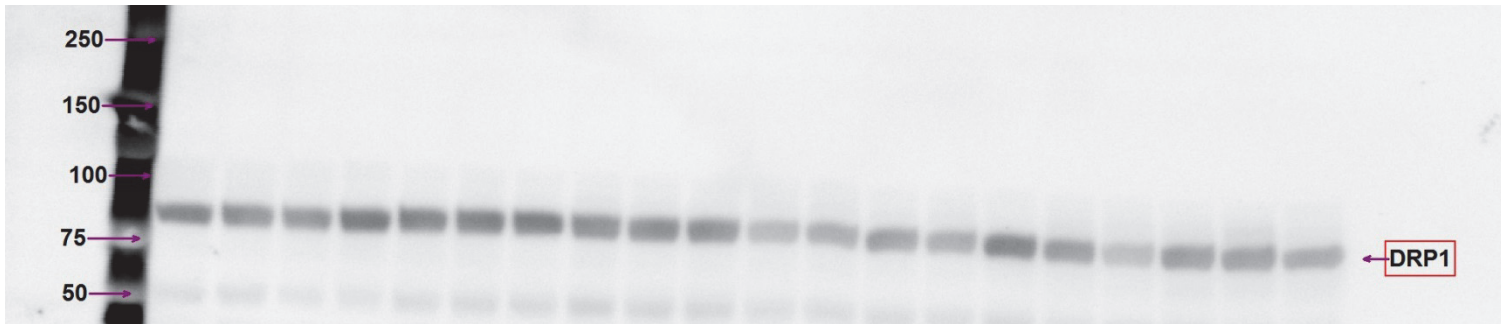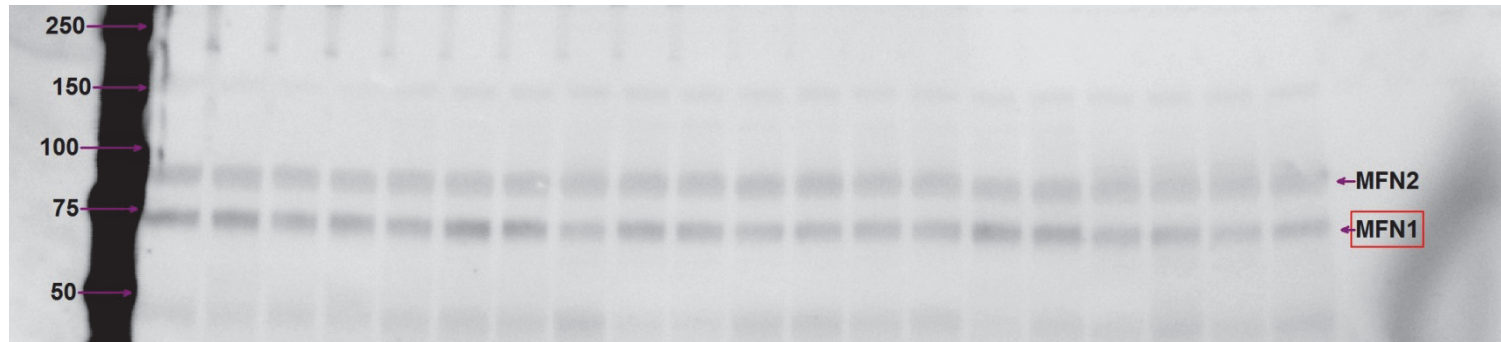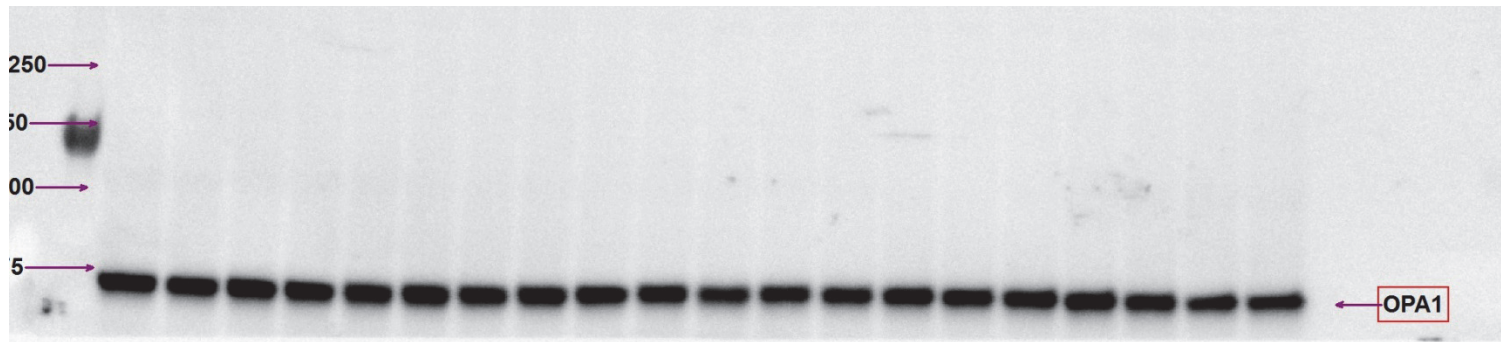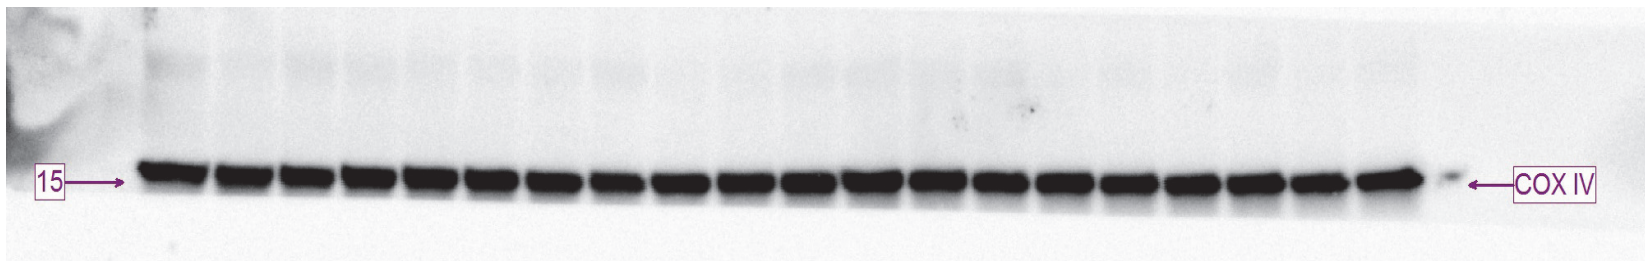

Original blots for Figure 7

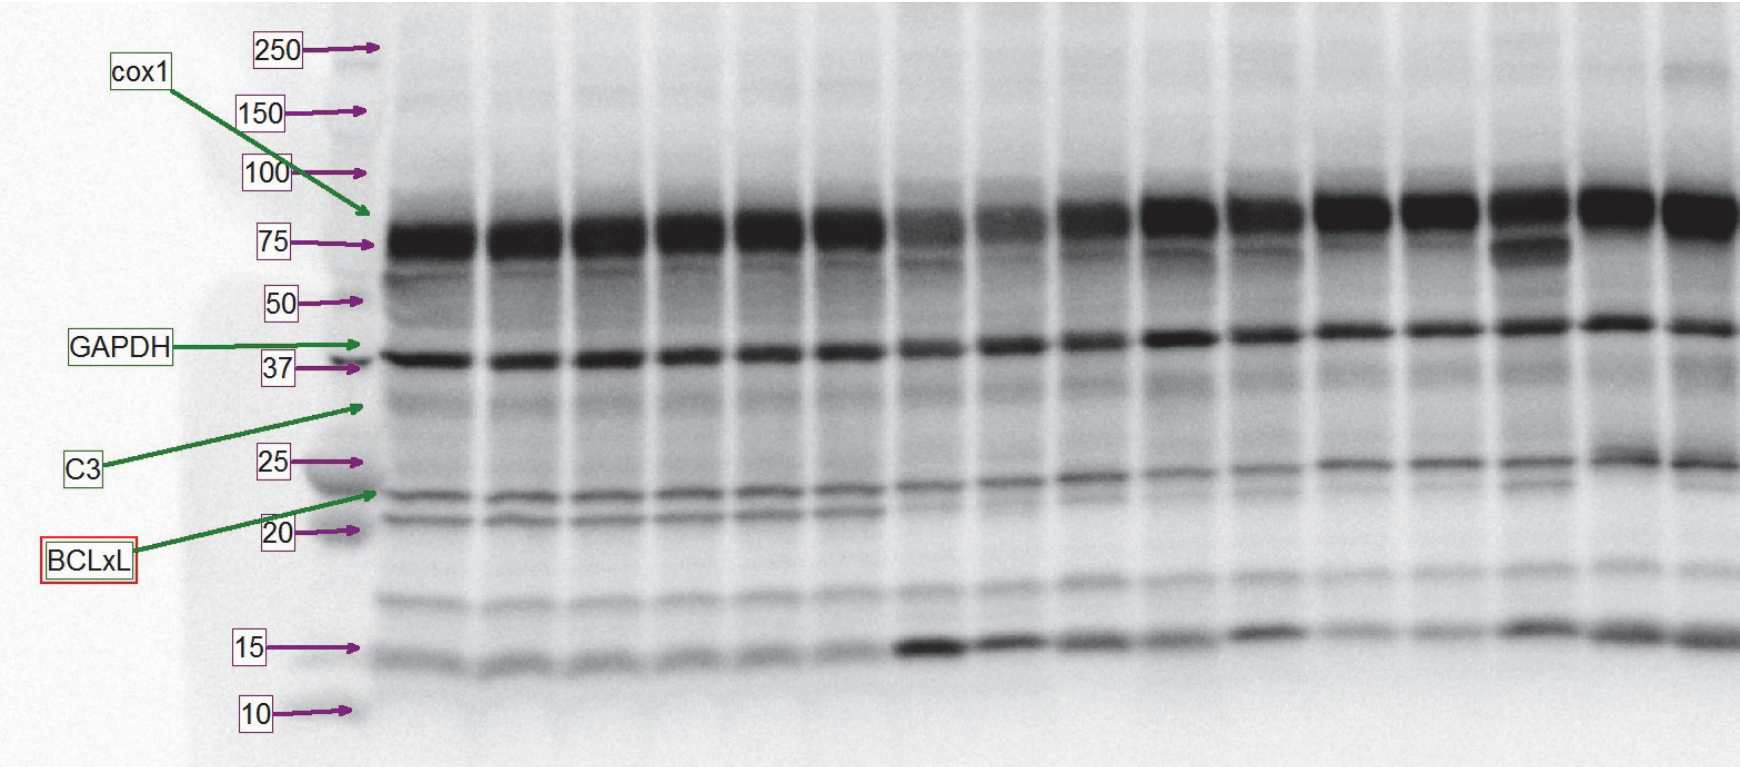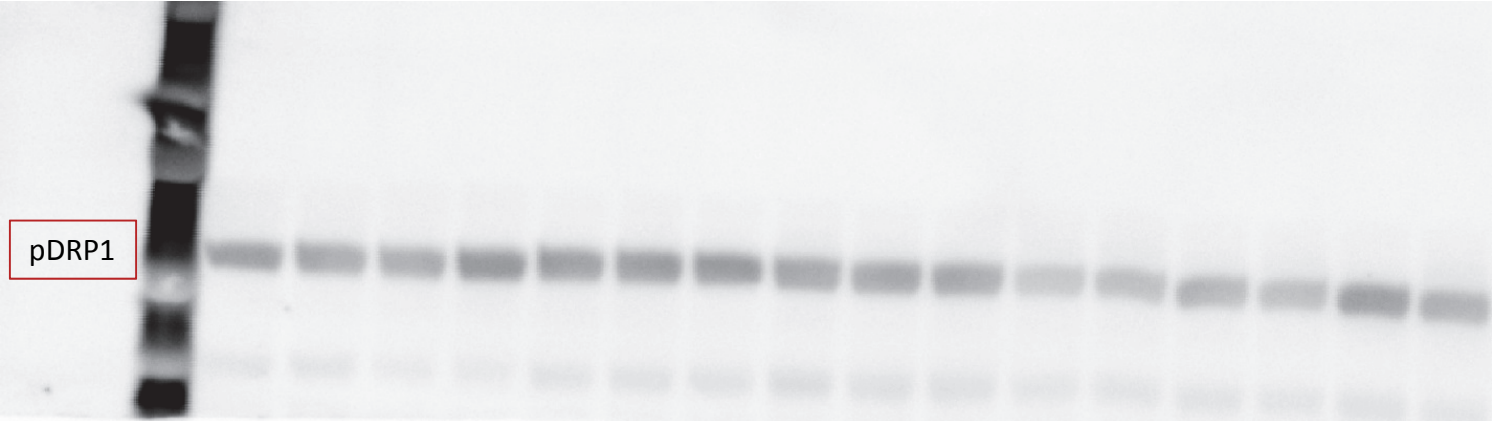

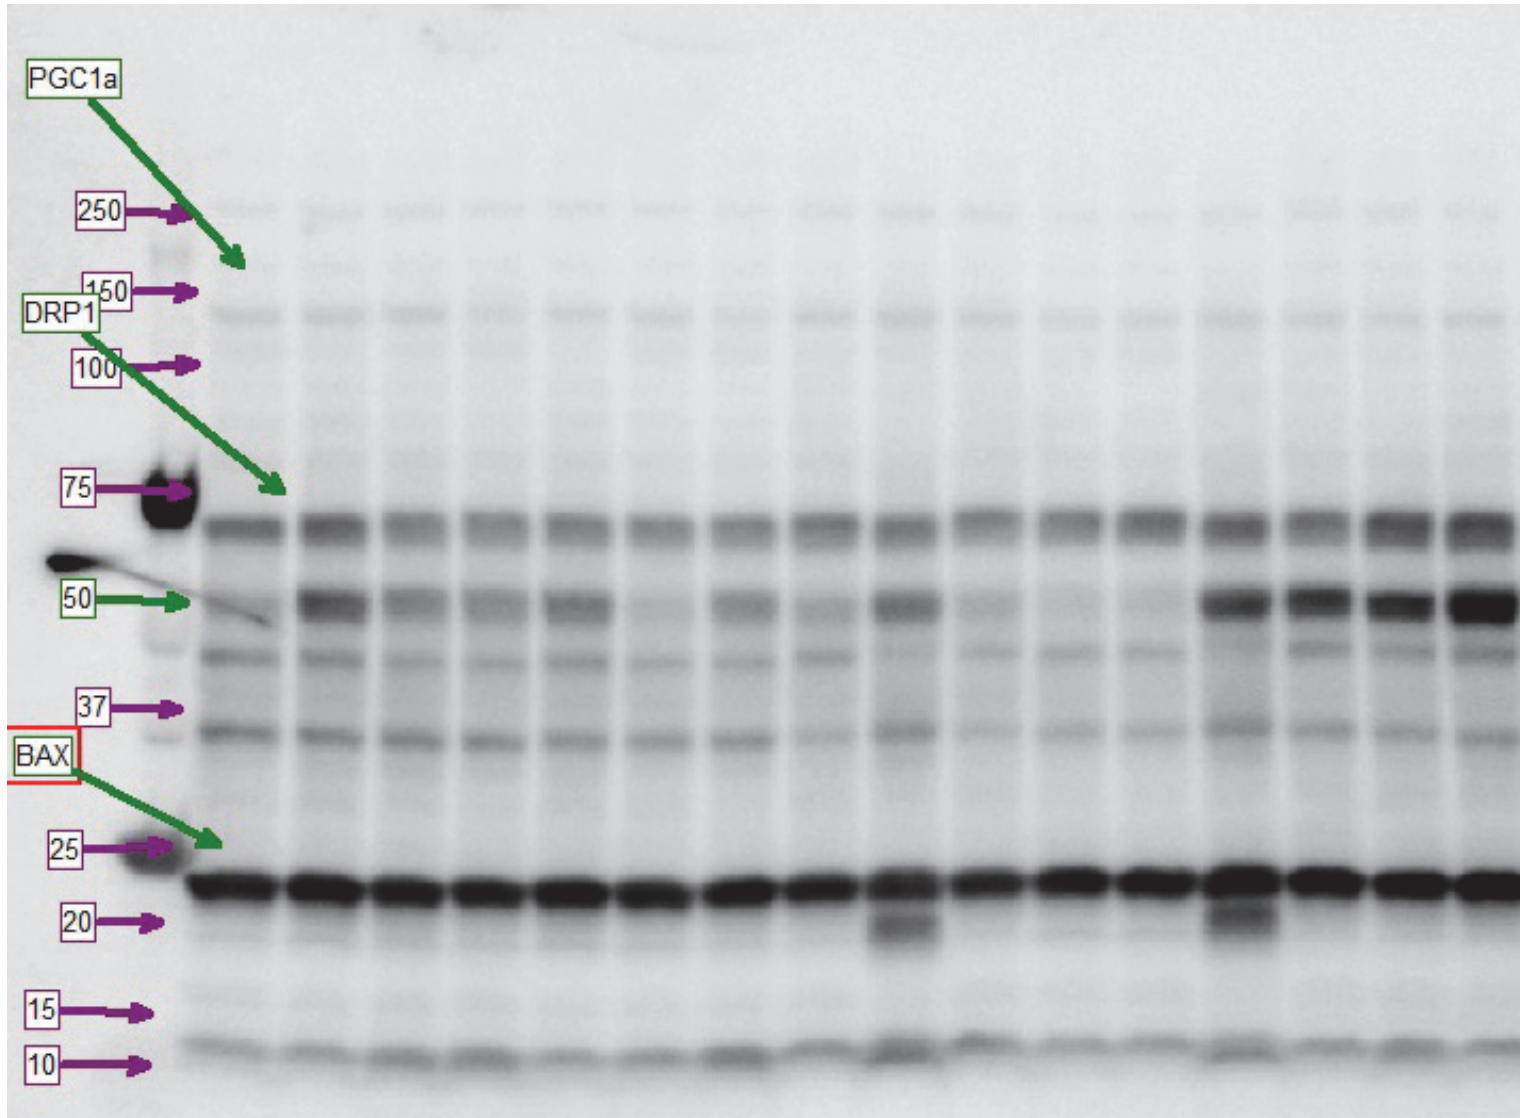

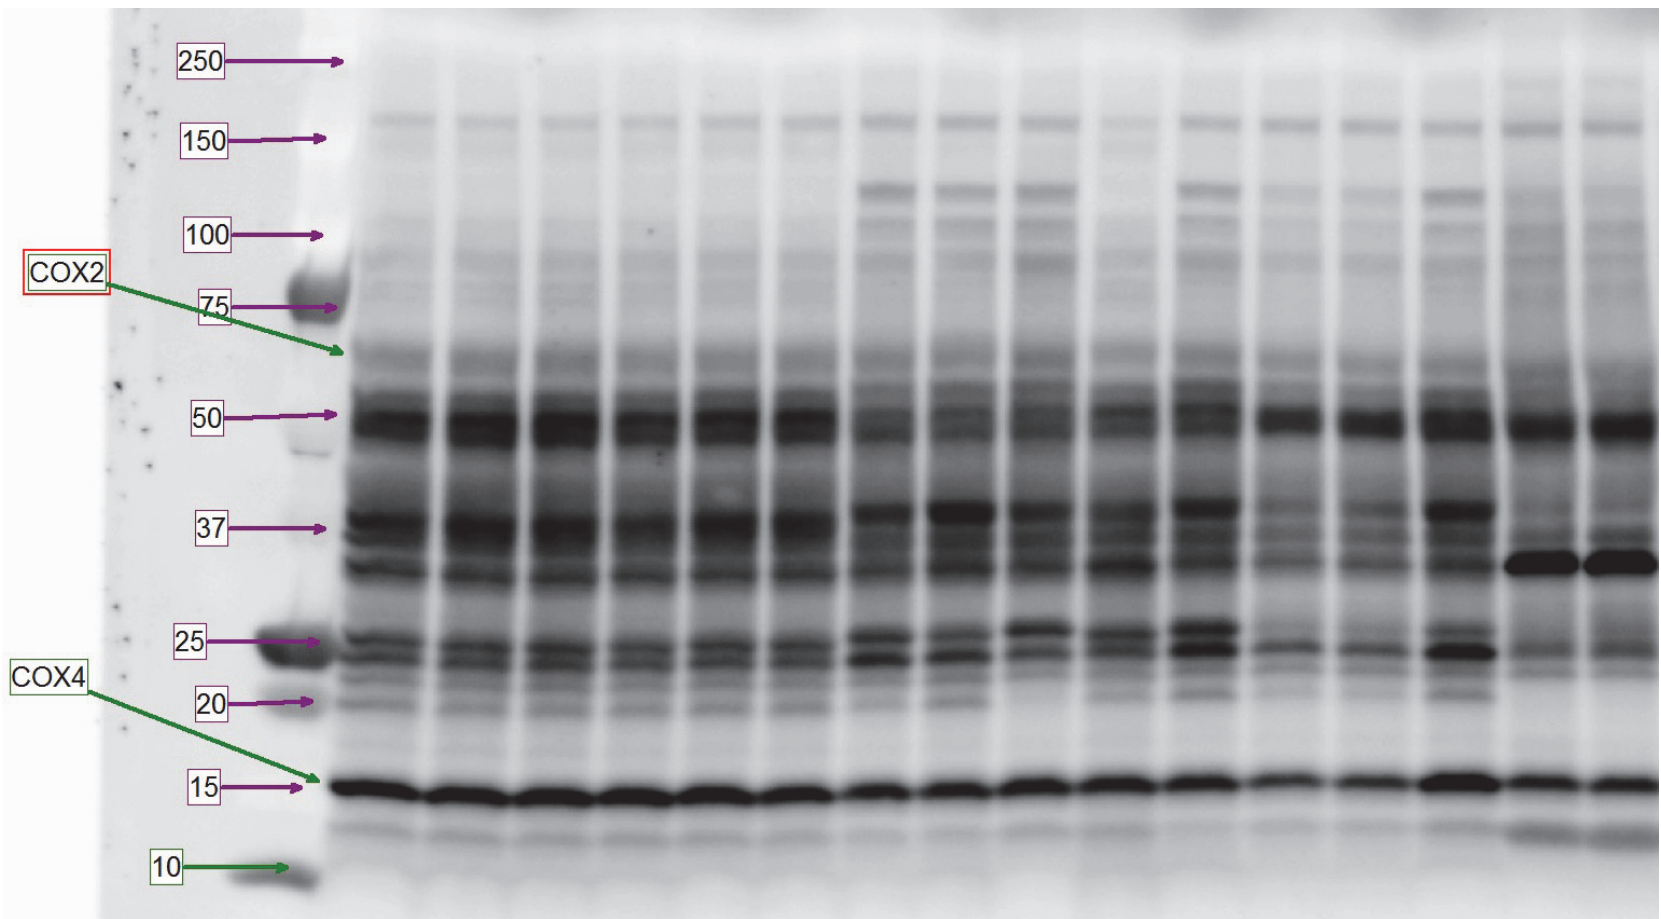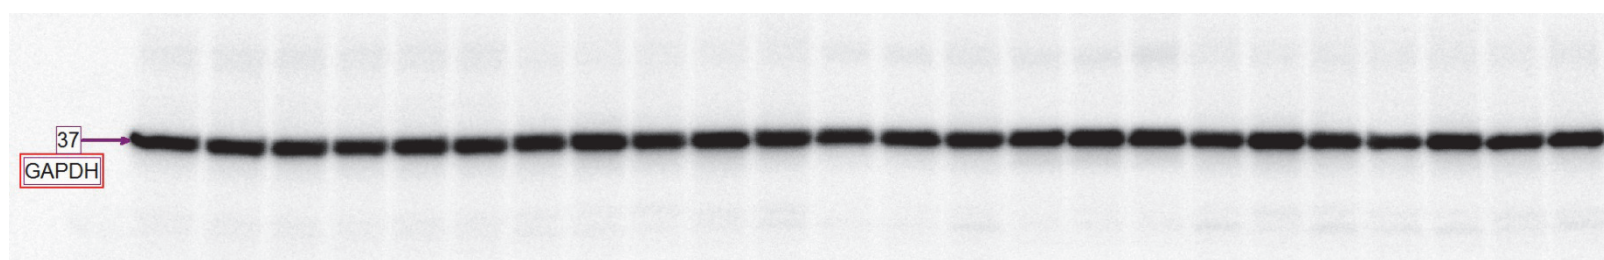

Supplement: 41598_2018_19750_MOESM1_ESM.pdf [file 41598_2018_19750_MOESM1_ESM.pdf]
